# Supplementary material for: Rapid Identification between Two Fish Species Using UV-Vis Spectroscopy for Substitution Detection
Source: MDPI journal article supplement (doi:10.3390/molecules26216529), 2021-10-28
Supplement: s1 [file s1]

## **Supplementary Materials for**

# **Rapid identification between two fish species by UV-Vis spectroscopy for substitution detection**

Zhaoliang Chai, Chengyu Wang, Hongyan Bi\*

College of Food Science and Engineering, Shanghai Ocean University, Hucheng Ring  
Road 999, Pudong New District, 201306 Shanghai, China

\*To whom correspondence should be addressed. Tel.: +86-21-61900364;

Fax: +86-21-61900365; E-mail address: hybi@shou.edu.cn

E-mail addresses for the other authors: chaizhaoliang2020@163.com;

wangchengyu1002@163.com

## S1. Comparison of muscle tissues on different parts of fish sample

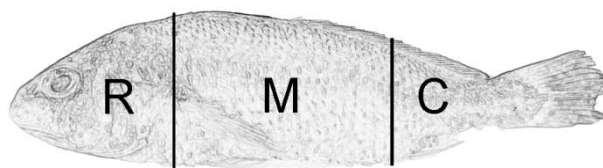

**Figure S1.** The three parts of the fish sample, including rostral (R), middle (M) and caudal (C) parts for sampling the muscle sample.

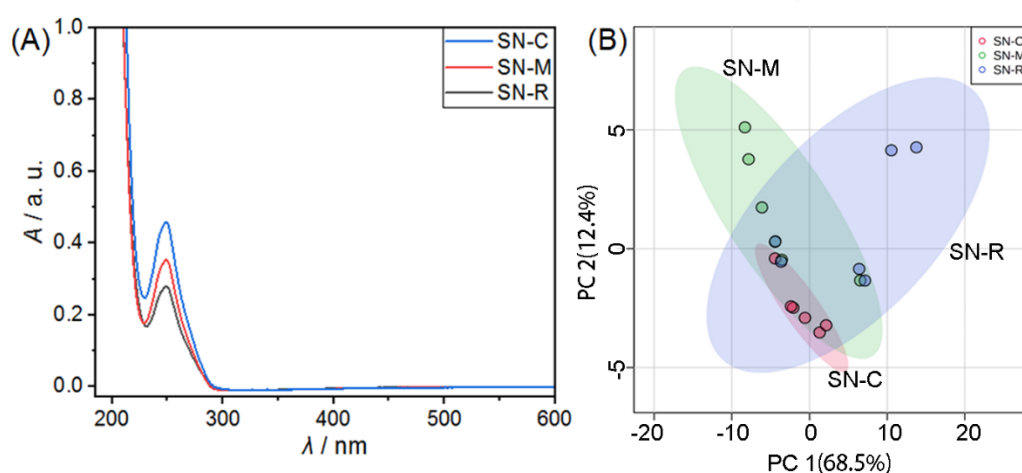

**Figure S2.** A) Representative UV-Vis spectra of solution of extracts from rostral (R), middle (M) and caudal (C) part of *Scomberomorus niphonius* (SN), respectively. B) Plot of PCA scores for UV-Vis spectra of three fish parts, that is, rostral (R), middle (M) and caudal (C) part of SN, respectively. Six UV-Vis spectra were obtained for each part. The initial extract of fish muscle tissue was diluted 80-fold with DI water.

## S2. Impact of dilution of initial protein extracts on the distinguishment of fishes using UV-Vis spectrum

Figure S3 shows the plot of PCA scores for the UV-Vis spectroscopic results of different dilution folds (20, 40, 60, 80, 100) of the initial extracts of the analyzed fish species. It can be seen that the points for the the UV-Vis spectroscopic results under different dilution folds cluster in very close area, illustrating the distinguishment of the analyzed fish species under this data processing mode fails.

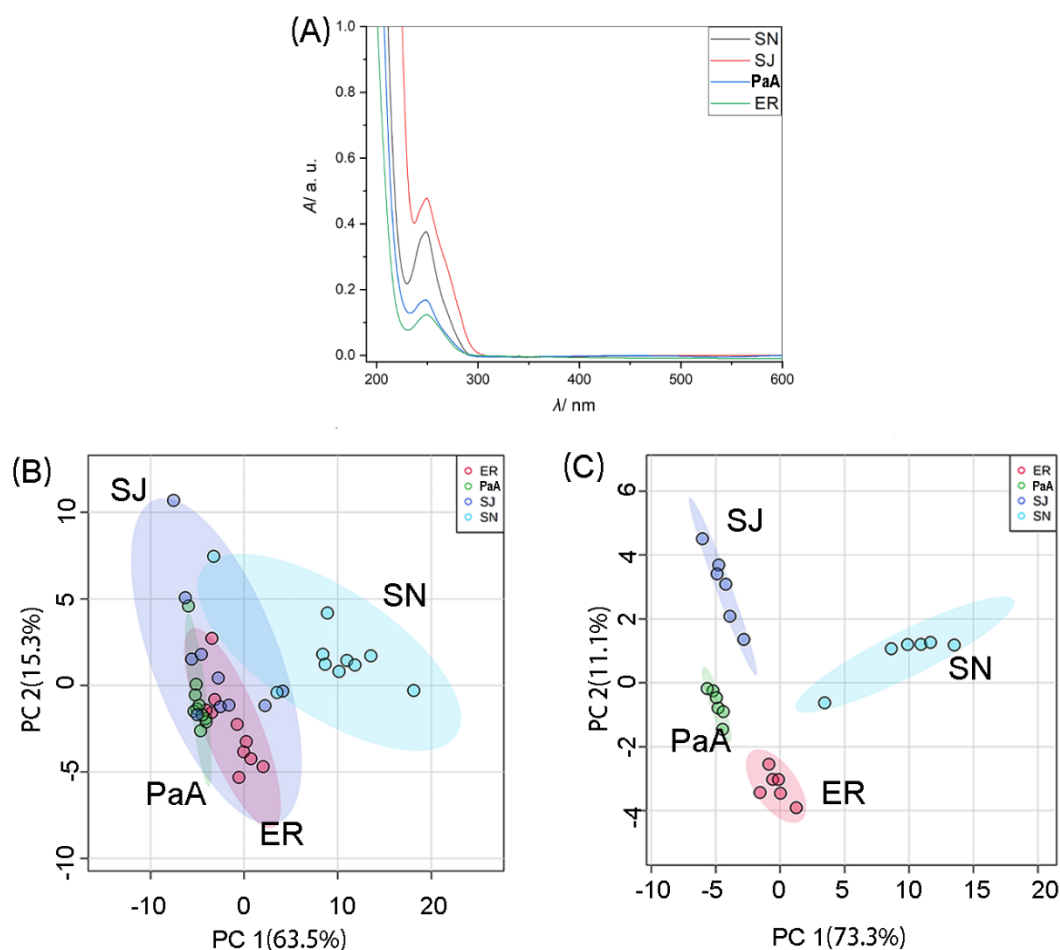

**Figure S3.** A) UV-Vis spectra of extracts from four fish samples of *Scomber japonicus* (SJ), *Scomberomorus niphonius* (SN), *Epinephelus rivulatus* (ER) and *Pampus argenteus* (PaA). B) Plot of principle component analysis (PCA) scores for the UV-Vis spectra of tissue extracts of the fish species SJ, SN, ER and PA. The obtained fish tissue extract was diluted with the fold of 20, 40, 60, 80, and 100, respectively. C) Plot of PCA scores of UV-Vis spectra of the four fish species. The obtained fish tissue extract was diluted 80-folds with DI water.

### S3. Comparison of the PCA scores for the UV-Vis spectra of different fish species

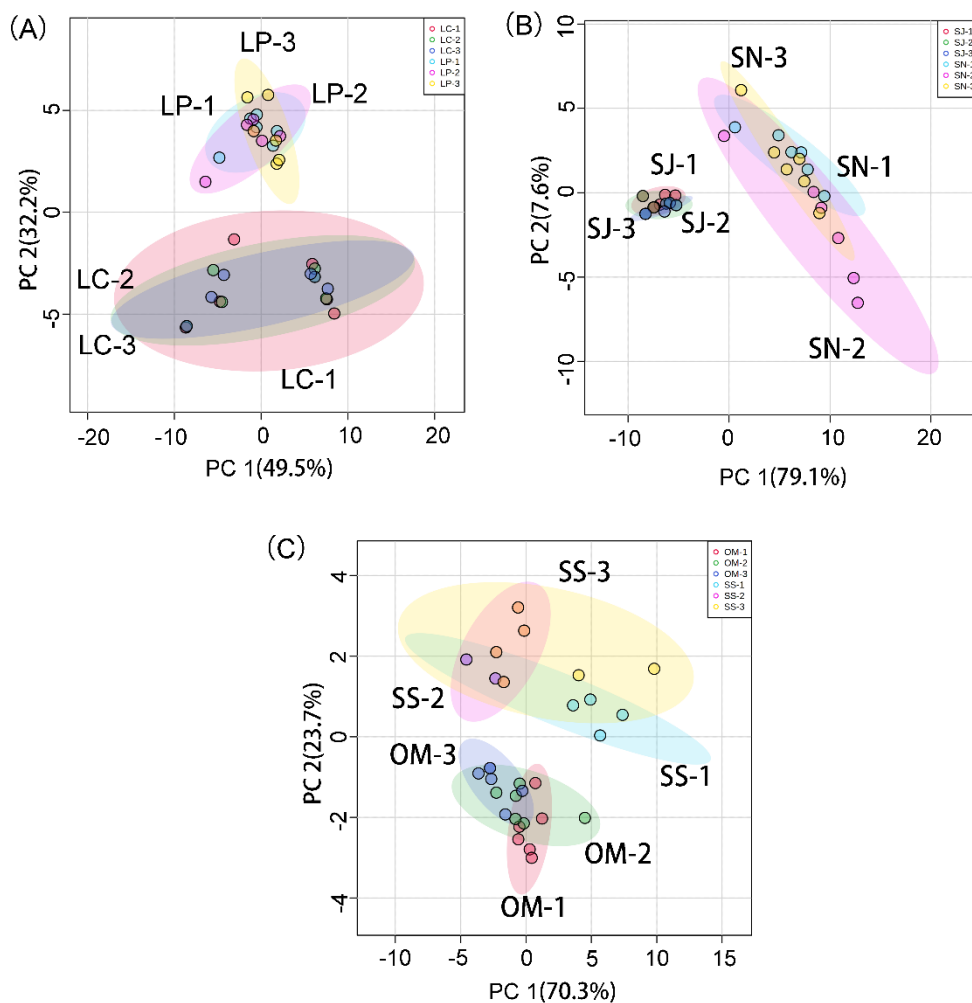

**Figure S4.** A) Plot of principal component analysis (PCA) scores for the UV-Vis spectra of fish species of *Larimichthys crocea* (LC) and *Larimichthys polyactis* (LP). B) Plot of PCA scores for the UV-Vis spectra of fish species of *Scomber japonicus* (SJ) and *Scomberomorus niphonius* (SN). C) Plot of PCA scores for the UV-Vis spectra of fish species of *Oncorhynchus mykiss* (OM) and *Salmo salar* (SS). The extraction was conducted following the protocol detailed in experimental section 3.2. The initial extract of fish muscle sample was diluted 80-fold with deionized (DI) water for UV-Vis spectroscopic analysis. Three runs of experiments were performed for each fish species. The UV-Vis spectra were collected from experiment run 1, 2 and 3.

## S4. Distinguishment of two fish species at different levels

### S4.1. Distinguishment of fish samples belonging to the same class

*Epinephelus rivulatus* (ER), *Scomber japonicus* (SJ), *Scomberomorus niphonius* (SN) and *Larimichthys crocea* (LP) belonging to the class Actinopteri were analyzed as model fishes belonging to the same class. The results shown in Figure S5 demonstrate that the two fish species belonging to the same class can be well distinguished.

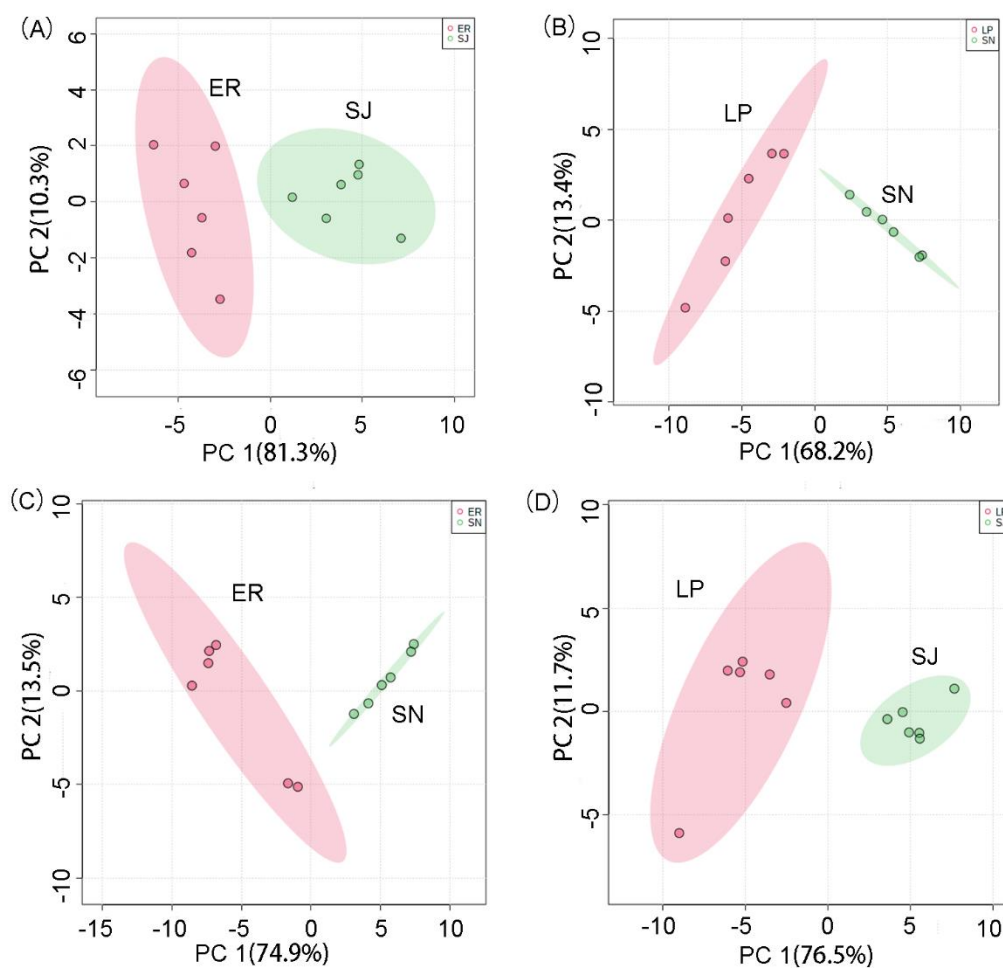

**Figure S5.** A) Plot of principle component analysis (PCA) score for the UV-Vis spectra of *Scomber japonicus* (SJ) and *Epinephelus rivulatus* (ER); B) Plot of PCA scores for the UV-Vis spectra of *Scomberomorus niphonius* (SN) and *Larimichthys crocea* (LP); C) Plot of PCA scores for the UV-Vis spectra of *Scomberomorus niphonius* (SN) and *Epinephelus rivulatus* (ER); D) Plot of PCA scores for the UV-Vis spectra of *Scomber japonicus* (SJ) and *Larimichthys crocea* (LP).

#### S4.2. Distinguishment of fish samples belonging to the same order

Four fish species belonging to the order Perciformes were analyzed to verify the assumption in the main text, including *Larimichthys crocea* (LC), *Larimichthys polyactis* (LP), *Epinephelus rivulatus* (ER) and *Pagrosomus major* (PM). As shown in Figure S6, two fish species in an identical order can be well distinguished.

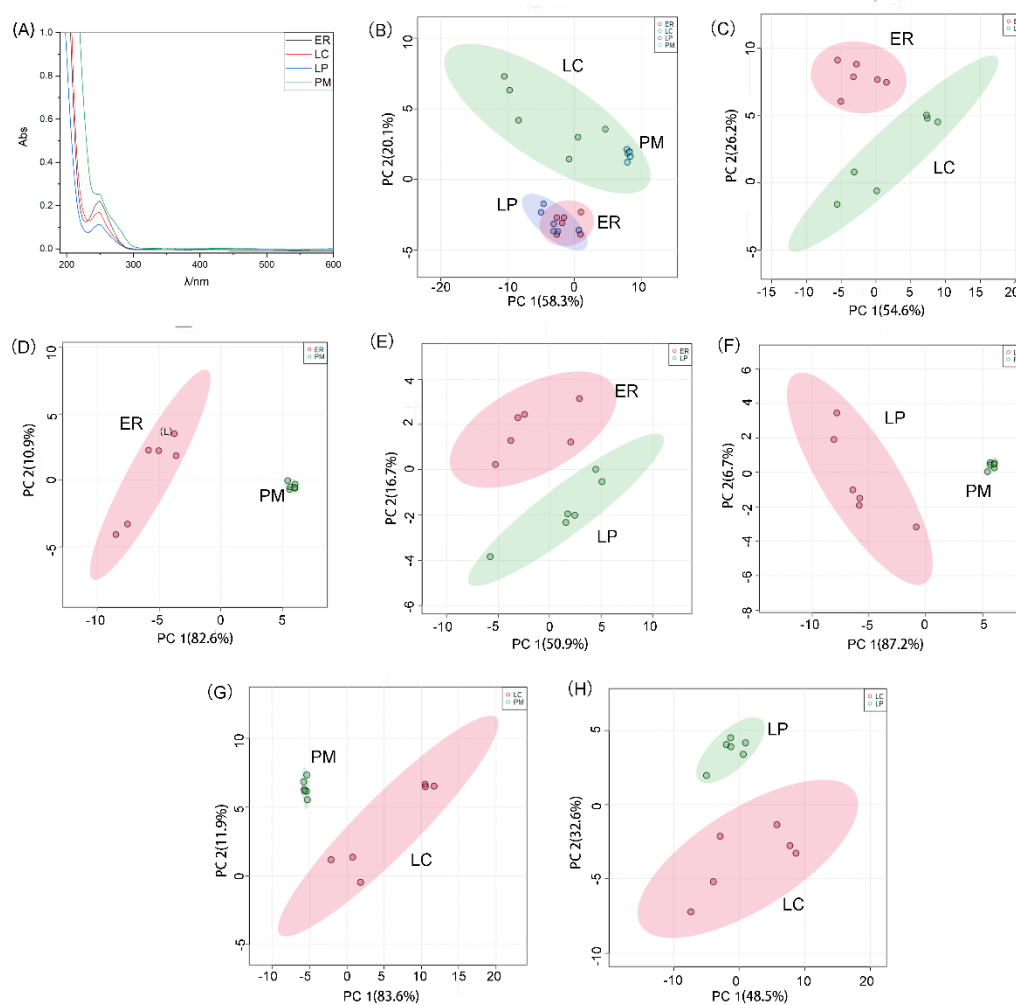

**Figure S6.** A) UV-Vis spectra of extracts from four fishes *Larimichthys crocea* (LC), *Larimichthys polyactis* (LP), *Epinephelus rivulatus* (ER) and *Pagrosomus major* (PM) belonging to an identical order. B) Plot of principle component analysis (PCA) scores for the UV-Vis spectra of four fish species. C) Plot of PCA scores for the UV-Vis spectra of ER and LC. D) Plot of PCA scores for the UV-Vis spectra of ER and PM. E) Plot of PCA scores for the UV-Vis spectra of ER and LP. F) Plot of PCA scores for

the UV-Vis spectra of LP and PM. G) Plot of PCA scores for the UV-Vis spectra of PM and LC. H) PCA score plot of LP and LC.

#### S4.3. Distinguishment of fish samples belonging to the same family

*Scomber japonicus* (SJ) and *Scomberomorus niphonius* (SN) belong to the same family Scombridae. *Culter alburnus* (CA) and *Pseudaspius leptcephalus* (PL) belong to the same family Cyprinidae. As shown in Figure S7, randomly chosen two fish species from the same family can be distinguished.

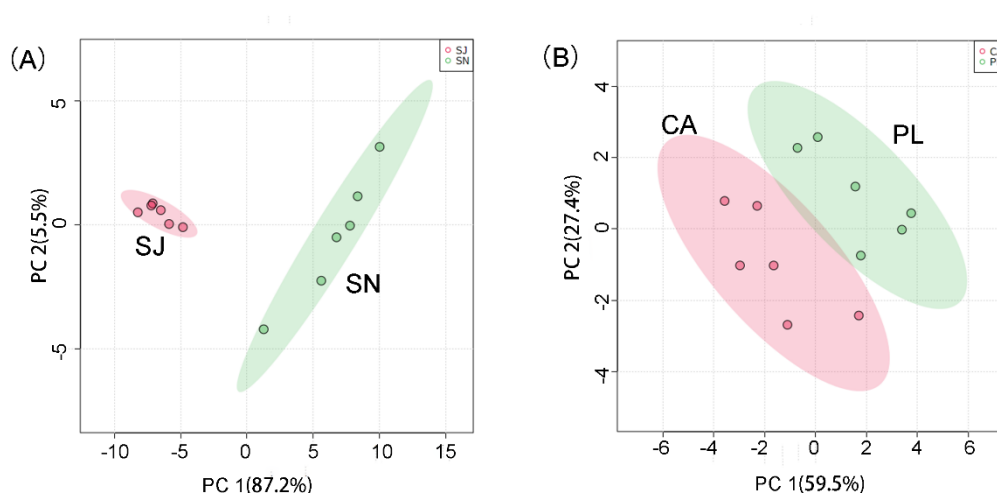

**Figure S7.** A) Plot of principle component analysis (PCA) scores for the UV-Vis spectra of *Scomber japonicus* (SJ) and *Scomberomorus niphonius* (SN). B) Plot of PCA scores for the UV-Vis spectra of *Culter alburnus* (CA) and *Pseudaspius leptcephalus* (PL).

#### S4.4. Distinguishment of fish samples belonging to the same genus

*Larimichthys polyactis* (LP) and *Larimichthys crocea* (LC) belong to the same genus *Larimichthys*. The results shown in Figure 4D show that two fish species from the same genus can be distinguished.

## S5. Genetic test for the blind sample in the present study

**Table S1.** PCR reaction system.

|                            |         |
|----------------------------|---------|
| ddH <sub>2</sub> O         | 15.3 µL |
| 10X Buffer                 | 2 µL    |
| template                   | 1 µL    |
| primer F                   | 0.5 µL  |
| primer R                   | 0.5 µL  |
| dNTP                       | 0.5 µL  |
| trans start Taq polymerase | 0.2 µL  |
| total volume               | 20 µL   |

**Table S2.** PCR procedure.

|       |       |           |
|-------|-------|-----------|
| 95 °C | 5 min |           |
| 95 °C | 30 s  |           |
| 61 °C | 30 s  | 10 cycles |
| 72 °C | 30 s  |           |
| 95 °C | 30 s  |           |
| 58 °C | 30 s  | 32 cycle  |
| 72 °C | 30 s  |           |
| 72 °C |       |           |
| 10 °C | 5 min |           |

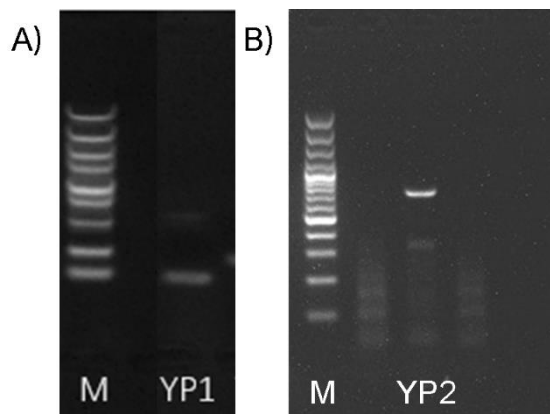

**Figure S8.** Electrophoresis results of polymerase chain reaction (PCR) of (A) unknown sample (US) in lane marked with YP 1 A), and sample from fish fillet of *Larimichthys Procea* as positive control in lane marked with YP 2 B). Lane marked with M is marker D2000 DNA Ladder (D2000).

|   | Description                                                                                                   | Common Name         | Max Score | Total Score | Query Cover | E value | Per. Ident | Acc. Len | Accession                      |
|---|---------------------------------------------------------------------------------------------------------------|---------------------|-----------|-------------|-------------|---------|------------|----------|--------------------------------|
| ✓ | PREDICTED: <i>Larimichthys crocea</i> mitogen-activated protein kinase 7 (mapk7), transcript variant X2, mRNA | large yellow cr ... | 311       | 311         | 100%        | 9e-81   | 98.86%     | 3500     | <a href="#">XM_027289425.1</a> |
| ✓ | PREDICTED: <i>Larimichthys crocea</i> mitogen-activated protein kinase 7 (mapk7), transcript variant X1, mRNA | large yellow cr ... | 311       | 311         | 100%        | 9e-81   | 98.86%     | 3701     | <a href="#">XM_010751406.3</a> |
| ✓ | <i>Larimichthys crocea</i> extracellular signal-regulated kinase 5 (ERK5) mRNA, complete cds                  | large yellow cr ... | 311       | 311         | 100%        | 9e-81   | 98.86%     | 3720     | <a href="#">KP343674.1</a>     |
| ✓ | <i>Larimichthys crocea</i> genome assembly, chromosome XIX                                                    | large yellow cr ... | 300       | 300         | 100%        | 2e-77   | 97.71%     | 20232972 | <a href="#">LT972185.1</a>     |



**Figure S9.** Sequence alignment results of gene amplification products of the unknown sample analyzed in this study.

Sequences producing significant alignments Download New Manage columns Show 100 ?

☒ select all 100 sequences selected [GenBank](#) [Graphics](#) [Distance tree of results](#) New [MSA Viewer](#)

|                                     | Description                                                                                            | Scientific Name                   | Common Name                    | Taxid                  | Max Score | Total Score | Query Cover | E value | Per. Ident | Acc. Len | Accession                  |
|-------------------------------------|--------------------------------------------------------------------------------------------------------|-----------------------------------|--------------------------------|------------------------|-----------|-------------|-------------|---------|------------|----------|----------------------------|
| <input checked="" type="checkbox"/> | <a href="#">Larimichthys polyactis</a> solate_CO1B5 cytochrome oxidase subunit I (COI) gene_parti...   | <a href="#">Larimichthys p...</a> | <a href="#">yellow croaker</a> | <a href="#">334908</a> | 610       | 610         | 100%        | 2e-170  | 97.77%     | 714      | <a href="#">EU266386.1</a> |
| <input checked="" type="checkbox"/> | <a href="#">Larimichthys polyactis</a> mitochondrion_complete genome                                   | <a href="#">Larimichthys p...</a> | <a href="#">yellow croaker</a> | <a href="#">334908</a> | 575       | 575         | 97%         | 9e-160  | 96.84%     | 16470    | <a href="#">GU586227.1</a> |
| <input checked="" type="checkbox"/> | <a href="#">Larimichthys polyactis</a> mitochondrion_complete genome                                   | <a href="#">Larimichthys p...</a> | <a href="#">yellow croaker</a> | <a href="#">334908</a> | 575       | 575         | 97%         | 9e-160  | 96.84%     | 16470    | <a href="#">FJ618559.1</a> |
| <input checked="" type="checkbox"/> | <a href="#">Larimichthys polyactis</a> solate_QD2014111901 cytochrome c oxidase subunit I (COX1)...    | <a href="#">Larimichthys p...</a> | <a href="#">yellow croaker</a> | <a href="#">334908</a> | 569       | 569         | 93%         | 4e-158  | 97.62%     | 683      | <a href="#">MF004322.1</a> |
| <input checked="" type="checkbox"/> | <a href="#">Larimichthys polyactis</a> solate_QD2015012001 cytochrome c oxidase subunit I (COX1)...    | <a href="#">Larimichthys p...</a> | <a href="#">yellow croaker</a> | <a href="#">334908</a> | 564       | 564         | 93%         | 2e-156  | 97.32%     | 684      | <a href="#">MF004321.1</a> |
| <input checked="" type="checkbox"/> | <a href="#">Larimichthys polyactis</a> solate_B15 cytochrome oxidase subunit I (COI) gene_partial c... | <a href="#">Larimichthys p...</a> | <a href="#">yellow croaker</a> | <a href="#">334908</a> | 564       | 564         | 94%         | 2e-156  | 97.05%     | 688      | <a href="#">HM068248.1</a> |
| <input checked="" type="checkbox"/> | <a href="#">Larimichthys polyactis</a> solate_B13 cytochrome oxidase subunit I (COI) gene_partial c... | <a href="#">Larimichthys p...</a> | <a href="#">yellow croaker</a> | <a href="#">334908</a> | 564       | 564         | 94%         | 2e-156  | 97.05%     | 688      | <a href="#">HM068246.1</a> |
| <input checked="" type="checkbox"/> | <a href="#">Larimichthys polyactis</a> solate_B9 cytochrome oxidase subunit I (COI) gene_partial cd... | <a href="#">Larimichthys p...</a> | <a href="#">yellow croaker</a> | <a href="#">334908</a> | 564       | 564         | 94%         | 2e-156  | 97.05%     | 688      | <a href="#">HM068244.1</a> |
| <input checked="" type="checkbox"/> | <a href="#">Larimichthys polyactis</a> solate_B5 cytochrome oxidase subunit I (COI) gene_partial cd... | <a href="#">Larimichthys p...</a> | <a href="#">yellow croaker</a> | <a href="#">334908</a> | 564       | 564         | 94%         | 2e-156  | 97.05%     | 688      | <a href="#">HM068241.1</a> |

**Figure S10.** Sequence alignment results of gene amplification products of sample from fish fillet of *Larimichthys polyactis* analyzed in this study.

## S6. Information about fish samples used in the present study

**Table S3.** Scientific classification of the seafood samples studied in the present work.

The same classification levels are labeled with the same colors.

| fish species                    | class          | order         | family        | genus         | species                 |
|---------------------------------|----------------|---------------|---------------|---------------|-------------------------|
| <i>Scomberomorus niphonius</i>  | Actinopteri    | Scombriformes | Scombridae    | Scomberomorus | <i>S. niphonius</i>     |
| <i>Scomber japonicus</i>        | Actinopteri    | Scombriformes | Scombridae    | Scomber       | <i>S. japonicus</i>     |
| <i>Pampus argenteus</i>         | Actinopterygii | Scombriformes | Stromateidae  | Pampus        | <i>P. argenteus</i>     |
| <i>Epinephelus retouti</i>      | Actinopterygii | Perciformes   | Serranidae    | Epinephelus   | <i>E. rivulatus</i>     |
| <i>Pagrosomus major</i>         | Actinopterygii | Perciformes   | Sparidae      | Pagrus        | <i>P. major</i>         |
| <i>Larimichthys crocea</i>      | Actinopterygii | Perciformes   | Sciaenidae    | Larimichthys  | <i>L. crocea</i>        |
| <i>Larimichthys polyactis</i>   | Actinopterygii | Perciformes   | Sciaenidae    | Larimichthys  | <i>L. polyactis</i>     |
| <i>Culter alburnus</i>          | Actinopterygii | Cypriniformes | Cyprinidae    | Culter        | <i>C. alburnus</i>      |
| <i>Pseudaspius leptcephalus</i> | Actinopterygii | Cypriniformes | Cypriniformes | Chanodichthys | <i>C. erythropterus</i> |
| <i>Oncorhynchus mykiss</i>      | Actinopteri    | Salmoniformes | Salmonidae    | Oncorhynchus  | <i>O. mykiss</i>        |
| <i>Salmo salar</i>              | Actinopteri    | Salmoniformes | Salmonidae    | Salmo         | <i>S. salar</i>         |
| <i>Pennahia argentata</i>       | Actinopterygii | Perciformes   | Sciaenidae    | Pennahia      | <i>P. argentata</i>     |

**Table S4.** Size and weight of fish samples analyzed in the present study. *Salmo salar* (SS) sample was obtained as fillet, and the size and weight of the whole fish samples are not available (N/A). Among the analyzed fish samples, SJ, SN, LC, LP, ER, PaA, PM, PeA and SS are marine fishes, while OM, CA and PL are freshwater fishes. The fishes SN, LC, LP, ER, PaA, OM, CA, PL, PeA and SS are predators, PM and SJ are omnivores.

| No. | species                               | trader                                | place of purchase (probable origin) | purchase time | biological replicates | length/cm | weight/g    |
|-----|---------------------------------------|---------------------------------------|-------------------------------------|---------------|-----------------------|-----------|-------------|
| 1   | <i>Scomber japonicus</i> (SJ)         | Sucheng raw food materials (苏呈食材)     | Suzhou, Jiangsu, China              | Aug. 2020     | 6                     | 29.5±1.8  | 486.7±61.6  |
| 2   | <i>Scomberomorus niphonius</i> (SN)   | Sucheng raw food materials (苏呈食材)     | Suzhou, Jiangsu, China              | Aug. 2020     | 6                     | 44.5±1.3  | 628.0±13.4  |
| 3   | <i>Pampus argenteus</i> (PaA)         | Yuge first class cabin (渔哥头等舱)        | Qingdao, Shandong, China            | Jul. 2020     | 6                     | 15.5±0.4  | 60.7±2.3    |
| 4   | <i>Epinephelus rivulatus</i> (ER)     | Yuge first class cabin (渔哥头等舱)        | Qingdao, Shandong province          | Jul. 2020     | 3                     | 42.0±9.8  | 703.3±46.7  |
| 5   | <i>Culter alburnus</i> (CA)           | Qiandao Yuxiang (千岛鱼香)                | Hangzhou, Zhejiang, China           | Aug. 2020     | 6                     | 26.5±2.6  | 108.3±26.7  |
| 6   | <i>Pseudaspius leptocephalus</i> (PL) | Qiandao yuxiang (千岛鱼香)                | Hangzhou, Zhejiang, China           | Aug. 2020     | 6                     | 34.9±1.8  | 262.5±42.5  |
| 7   | <i>Larimichthys crocea</i> (LC)       | Jinxiansheng aquatic products (金先生海产) | Ningbo, Zhejiang, China             | Aug. 2020     | 6                     | 26.6±5.8  | 317.5±17.5  |
| 8   | <i>Pagrosomus major</i> (PM)          | Siji seafood store (四季海鲜店)            | Yantai, Shandong, China             | Aug. 2020     | 6                     | 28.4±2.9  | 412.5±67.5  |
| 9   | <i>Larimichthys polyactis</i> (LP)    | Yuge first class cabin (渔哥头等舱)        | Qingdao, Shandong, China            | Aug. 2020     | 6                     | 17.7±1.2  | 67.5±7.5    |
| 10  | <i>Pennahia argentata</i> (PeA)       | Shili (Ten Mile) Seafood (十里海鲜店)      | Zhanjiang, Guangdong, China         | Dec. 2020     | 6                     | 17.5±1.8  | 55.5±8.5    |
| 11  | <i>Salmo salar</i> (SS)               | Ftabest (Lingang, Shanghai) (自贸优选)    | Shanghai, China                     | Dec. 2020     | 3 fillets             | N/A       | N/A         |
| 12  | <i>Oncorhynchus mykiss</i> (OM)       | Yinggui Plantation business (应桂农园商贸)  | Qingdao, Shandong, China            | Dec. 2020     | 3                     | 40.5±7.5  | 805.6±215.2 |
